# Supplementary material for: Microbiome differential abundance methods produce different results across 38 datasets
Source: PubMed Central journal article supplement (PMC8763921; doi:10.1038/s41467-022-28034-z), 2022-01-17
Supplement: 41467_2022_28034_MOESM3_ESM.pdf [file 41467_2022_28034_MOESM3_ESM.pdf]

### **Description of Additional Supplementary Files**

File Name: Supplementary Data 1

Description: Contains all data to reproduce figures and tables shown within this manuscript with the exception of supplemental figure 1AB. Data to reproduce this figure can be found in the Github repository referenced in the data availability section.
